# Supplementary material for: Hypergolic zeolitic imidazolate frameworks (ZIFs) as next-generation solid fuels: Unlocking the latent energetic behavior of ZIFs
Source: PubMed Central journal article supplement — Sci Adv. 2019 Apr 5;5(4):eaav9044. doi: 10.1126/sciadv.aav9044 (PMC6450693; doi:10.1126/sciadv.aav9044), 2019-04-05

## checkCIF/PLATON report

You have not supplied any structure factors. As a result the full set of tests cannot be run.

THIS REPORT IS FOR GUIDANCE ONLY. IF USED AS PART OF A REVIEW PROCEDURE FOR PUBLICATION, IT SHOULD NOT REPLACE THE EXPERTISE OF AN EXPERIENCED CRYSTALLOGRAPHIC REFEREE.

No syntax errors found.      CIF dictionary      Interpreting this report

### Datablock: Zn\_AIm

---

|                 |                |                    |               |
|-----------------|----------------|--------------------|---------------|
| Bond precision: | C-C = 0.0117 A | Wavelength=1.54180 |               |
| Cell:           | a=17.0454(11)  | b=17.0454(11)      | c=17.0454(11) |
|                 | alpha=90       | beta=90            | gamma=90      |
| Temperature:    | 293 K          |                    |               |
|                 | Calculated     | Reported           |               |
| Volume          | 4952.5(10)     | 4952.5(9)          |               |
| Space group     | I -4 3 m       | I-43m              |               |
| Hall group      | : I -4 2 3     | I -4 2 3           |               |
| Moiety formula  | C10 H6 N4 Zn   | C10 H6 N4 Zn       |               |
| Sum formula     | C10 H6 N4 Zn   | C10 H6 N4 Zn       |               |
| Mr              | 247.58         | 247.56             |               |
| Dx,g cm-3       | 0.996          | 0.996              |               |
| Z               | 12             | 12                 |               |
| Mu (mm-1)       | 1.911          | 0.000              |               |
| F000            | 1488.0         | 1488.0             |               |
| F000'           | 1472.58        |                    |               |
| h,k,lmax        | 12,12,12       |                    |               |
| Nref            | 222[ 130]      |                    |               |
| Tmin,Tmax       |                |                    |               |
| Tmin'           |                |                    |               |

Correction method= Not given

Data completeness= 0.00/0.00      Theta(max)=

R(reflections)=      wR2(reflections)=

S =      Npar=

---

The following ALERTS were generated. Each ALERT has the format  
**test-name\_ALERT\_alert-type\_alert-level.**  
Click on the hyperlinks for more details of the test.

---

**Alert level A**

PLAT601\_ALERT\_2\_A Structure Contains Solvent Accessible VOIDS of . 2116 Ang\*\*3

**Author Response: This is an open, microporous metal-organic framework**

---

**Alert level B**

PLAT049\_ALERT\_1\_B Calculated Density Less Than 1.0 gcm-3 ..... 0.9961 Check

**Author Response: The low density is the consequence of structure porosity.**

---

**Alert level C**

REFI015\_ALERT\_1\_C \_refine\_ls\_shift/su\_max is missing  
Maximum shift/s.u. ratio after final refinement cycle.  
The following tests will not be performed  
SHFSU\_01  
PLAT341\_ALERT\_3\_C Low Bond Precision on C-C Bonds ..... 0.01167 Ang.

---

**Alert level G**

PLAT164\_ALERT\_4\_G Nr. of Refined C-H H-Atoms in Heavy-Atom Struct. 2 Note  
PLAT371\_ALERT\_2\_G Long C(sp2)-C(sp1) Bond C1 - C3 . 1.41 Ang.  
PLAT794\_ALERT\_5\_G Tentative Bond Valency for Zn1 (II) . 2.00 Info  
PLAT804\_ALERT\_5\_G Number of ARU-Code Packing Problem(s) in PLATON 41 Info  
PLAT860\_ALERT\_3\_G Number of Least-Squares Restraints ..... 1 Note

- 
- 1 **ALERT level A** = Most likely a serious problem - resolve or explain  
1 **ALERT level B** = A potentially serious problem, consider carefully  
2 **ALERT level C** = Check. Ensure it is not caused by an omission or oversight  
5 **ALERT level G** = General information/check it is not something unexpected

- 2 ALERT type 1 CIF construction/syntax error, inconsistent or missing data  
2 ALERT type 2 Indicator that the structure model may be wrong or deficient  
2 ALERT type 3 Indicator that the structure quality may be low  
1 ALERT type 4 Improvement, methodology, query or suggestion  
2 ALERT type 5 Informative message, check
- 

## Datablock: Co\_Aim

---

Bond precision: C-C = 0.0180 A

Wavelength=1.54180

Cell: a=16.9604(17) b=16.9604(17) c=16.9604(17)  
alpha=90 beta=90 gamma=90

Temperature: 293 K

|                | Calculated   | Reported     |
|----------------|--------------|--------------|
| Volume         | 4878.8(15)   | 4878.8(14)   |
| Space group    | I -4 3 m     | I-4 3 m      |
| Hall group     | : I -4 2 3   | I -4 2 3     |
| Moiety formula | C10 H6 Co N4 | C10 H6 Co N4 |
| Sum formula    | C10 H6 Co N4 | C10 H6 Co N4 |
| Mr             | 241.12       | 241.12       |
| Dx,g cm-3      | 0.985        | 0.985        |
| Z              | 12           | 12           |
| Mu (mm-1)      | 8.116        | 0.000        |
| F000           | 1452.0       | 1452.0       |
| F000'          | 1427.51      |              |
| h,k,lmax       | 10,10,10     |              |
| Nref           | 153[ 91]     |              |
| Tmin,Tmax      |              |              |
| Tmin'          |              |              |

Correction method= Not given

Data completeness= 0.00/0.00      Theta(max)=

R(reflections)=      wR2(reflections)=

S =      Npar=

The following ALERTS were generated. Each ALERT has the format  
**test-name\_ALERT\_alert-type\_alert-level**.  
Click on the hyperlinks for more details of the test.

 **Alert level A**

PLAT601\_ALERT\_2\_A Structure Contains Solvent Accessible VOIDS of .      2087 Ang\*\*3

**Author Response: This is an open, microporous metal-organic framework**

 **Alert level B**

PLAT049\_ALERT\_1\_B Calculated Density Less Than 1.0 gcm-3 .....      0.9848 Check

**Author Response: The low density is the consequence of porosity**

PLAT341\_ALERT\_3\_B Low Bond Precision on C-C Bonds .....      0.018 Ang.

**Author Response: The structure was solved from powder data.**

---

● **Alert level C**

REFI015\_ALERT\_1\_C \_refine\_ls\_shift/su\_max is missing  
Maximum shift/s.u. ratio after final refinement cycle.  
The following tests will not be performed  
SHFSU\_01

---

● **Alert level G**

|                   |                                                  |      |      |
|-------------------|--------------------------------------------------|------|------|
| PLAT164_ALERT_4_G | Nr. of Refined C-H H-Atoms in Heavy-Atom Struct. | 2    | Note |
| PLAT371_ALERT_2_G | Long C(sp2)-C(sp1) Bond C1 - C3                  | 1.42 | Ang. |
| PLAT794_ALERT_5_G | Tentative Bond Valency for Co1 (II)              | 1.71 | Info |
| PLAT804_ALERT_5_G | Number of ARU-Code Packing Problem(s) in PLATON  | 41   | Info |
| PLAT860_ALERT_3_G | Number of Least-Squares Restraints .....         | 3    | Note |

---

1 **ALERT level A** = Most likely a serious problem - resolve or explain  
2 **ALERT level B** = A potentially serious problem, consider carefully  
1 **ALERT level C** = Check. Ensure it is not caused by an omission or oversight  
5 **ALERT level G** = General information/check it is not something unexpected

2 ALERT type 1 CIF construction/syntax error, inconsistent or missing data  
2 ALERT type 2 Indicator that the structure model may be wrong or deficient  
2 ALERT type 3 Indicator that the structure quality may be low  
1 ALERT type 4 Improvement, methodology, query or suggestion  
2 ALERT type 5 Informative message, check

---

## Datablock: Co\_VIm

---

Bond precision: C-C = 0.0190 A

Wavelength=1.54180

Cell: a=17.2960(14) b=17.2960(14) c=17.2960(14)  
alpha=90 beta=90 gamma=90  
Temperature: 293 K

|                | Calculated    | Reported      |
|----------------|---------------|---------------|
| Volume         | 5174.1(13)    | 5174.1(13)    |
| Space group    | I -4 3 m      | I -4 3 m      |
| Hall group     | : I -4 2 3    | I -4 2 3      |
| Moiety formula | C10 H10 Co N4 | C10 H10 Co N4 |
| Sum formula    | C10 H10 Co N4 | C10 H10 Co N4 |
| Mr             | 245.15        | 245.15        |
| Dx,g cm-3      | 0.944         | 0.944         |
| Z              | 12            | 12            |
| Mu (mm-1)      | 7.653         | 0.000         |
| F000           | 1500.0        | 1500.0        |
| F000'          | 1475.48       |               |
| h,k,lmax       | 7,7,7         |               |
| Nref           | 58[ 37]       |               |
| Tmin,Tmax      |               |               |
| Tmin'          |               |               |

Correction method= Not given

Data completeness= 0.00/0.00           Theta(max)=

R(reflections)=                           wR2(reflections)=

S =                                       Npar=

---

The following ALERTS were generated. Each ALERT has the format  
**test-name\_ALERT\_alert-type\_alert-level**.  
Click on the hyperlinks for more details of the test.

---

 **Alert level A**

PLAT601\_ALERT\_2\_A Structure Contains Solvent Accessible VOIDS of .           2297 Ang\*\*3

**Author Response: This is an open, microporous metal-organic framework**

---

 **Alert level B**

PLAT049\_ALERT\_1\_B Calculated Density Less Than 1.0 gcm-3 .....           0.9441 Check

**Author Response: .Low density is a consequence of structure porosity.**

PLAT341\_ALERT\_3\_B Low Bond Precision on C-C Bonds .....           0.019 Ang.

**Author Response: The structure was solved from powder data.**

---

 **Alert level C**

REFI015\_ALERT\_1\_C \_refine\_ls\_shift/su\_max is missing  
Maximum shift/s.u. ratio after final refinement cycle.  
The following tests will not be performed  
SHFSU\_01

---

 **Alert level G**

PLAT164\_ALERT\_4\_G Nr. of Refined C-H H-Atoms in Heavy-Atom Struct.           2 Note  
PLAT180\_ALERT\_4\_G Check Cell Rounding: # of Values Ending with 0 =           3 Note  
PLAT300\_ALERT\_4\_G Atom Site Occupancy of C4           Constrained at           0.5 Check  
PLAT300\_ALERT\_4\_G Atom Site Occupancy of H2           Constrained at           0.5 Check  
PLAT300\_ALERT\_4\_G Atom Site Occupancy of H3           Constrained at           0.5 Check  
PLAT300\_ALERT\_4\_G Atom Site Occupancy of H4           Constrained at           0.5 Check  
PLAT301\_ALERT\_3\_G Main Residue Disorder .....(Resd 1 )           12% Note  
PLAT789\_ALERT\_4\_G Atoms with Negative \_atom\_site\_disorder\_group #           4 Check  
PLAT804\_ALERT\_5\_G Number of ARU-Code Packing Problem(s) in PLATON           45 Info  
PLAT860\_ALERT\_3\_G Number of Least-Squares Restraints .....           1 Note

- 
- 1 **ALERT level A** = Most likely a serious problem - resolve or explain  
2 **ALERT level B** = A potentially serious problem, consider carefully  
1 **ALERT level C** = Check. Ensure it is not caused by an omission or oversight

10 **ALERT level G** = General information/check it is not something unexpected

2 ALERT type 1 CIF construction/syntax error, inconsistent or missing data  
1 ALERT type 2 Indicator that the structure model may be wrong or deficient  
3 ALERT type 3 Indicator that the structure quality may be low  
7 ALERT type 4 Improvement, methodology, query or suggestion  
1 ALERT type 5 Informative message, check

---

## Datablock: Cd\_AIm

---

Bond precision: C-C = 0.0123 A Wavelength=1.54180

Cell: a=17.9712(9) b=17.9712(9) c=17.9712(9)  
alpha=90 beta=90 gamma=90

Temperature: 293 K

|                | Calculated   | Reported     |
|----------------|--------------|--------------|
| Volume         | 5804.1(9)    | 5804.0(9)    |
| Space group    | I -4 3 m     | I -4 3 m     |
| Hall group     | : I -4 2 3   | I -4 2 3     |
| Moiety formula | C10 H6 Cd N4 | C10 H6 Cd N4 |
| Sum formula    | C10 H6 Cd N4 | C10 H6 Cd N4 |
| Mr             | 294.60       | 294.60       |
| Dx,g cm-3      | 1.011        | 1.011        |
| Z              | 12           | 12           |
| Mu (mm-1)      | 8.910        | 0.000        |
| F000           | 1704.0       | 1704.0       |
| F000'          | 1709.69      |              |
| h,k,lmax       | 7,7,7        |              |
| Nref           | 62[ 39]      |              |
| Tmin,Tmax      |              |              |
| Tmin'          |              |              |

Correction method= Not given

Data completeness= 0.00/0.00 Theta(max)=

R(reflections)= wR2(reflections)=

S = Npar=

---

The following ALERTS were generated. Each ALERT has the format  
**test-name\_ALERT\_alert-type\_alert-level**.  
Click on the hyperlinks for more details of the test.

---

### Alert level A

PLAT601\_ALERT\_2\_A Structure Contains Solvent Accessible VOIDS of .

2775 Ang\*\*3

## Author Response: This is an open, microporous metal-organic framework.

---

### ● Alert level C

REFI015\_ALERT\_1\_C \_refine\_ls\_shift/su\_max is missing  
Maximum shift/s.u. ratio after final refinement cycle.  
The following tests will not be performed  
SHFSU\_01

PLAT241\_ALERT\_2\_C High 'MainMol' Ueq as Compared to Neighbors of N1 Check  
PLAT342\_ALERT\_3\_C Low Bond Precision on C-C Bonds ..... 0.01233 Ang.

---

### ● Alert level G

PLAT164\_ALERT\_4\_G Nr. of Refined C-H H-Atoms in Heavy-Atom Struct. 2 Note  
PLAT371\_ALERT\_2\_G Long C(sp2)-C(sp1) Bond C1 - C3 . 1.41 Ang.  
PLAT794\_ALERT\_5\_G Tentative Bond Valency for Cd1 (II) . 2.11 Info  
PLAT804\_ALERT\_5\_G Number of ARU-Code Packing Problem(s) in PLATON 1 Info  
PLAT860\_ALERT\_3\_G Number of Least-Squares Restraints ..... 1 Note

---

1 **ALERT level A** = Most likely a serious problem - resolve or explain  
0 **ALERT level B** = A potentially serious problem, consider carefully  
3 **ALERT level C** = Check. Ensure it is not caused by an omission or oversight  
5 **ALERT level G** = General information/check it is not something unexpected

1 ALERT type 1 CIF construction/syntax error, inconsistent or missing data  
3 ALERT type 2 Indicator that the structure model may be wrong or deficient  
2 ALERT type 3 Indicator that the structure quality may be low  
1 ALERT type 4 Improvement, methodology, query or suggestion  
2 ALERT type 5 Informative message, check

---

## Datablock: Cd\_VIm

---

Bond precision: C-C = 0.0200 A Wavelength=1.54180

Cell: a=18.234(2) b=18.234(2) c=18.234(2)  
alpha=90 beta=90 gamma=90

Temperature: 293 K

|                | Calculated    | Reported      |
|----------------|---------------|---------------|
| Volume         | 6062(2)       | 6062(2)       |
| Space group    | I -4 3 m      | I -4 3 m      |
| Hall group     | : I -4 2 3    | I -4 2 3      |
| Moiety formula | C10 H10 Cd N4 | C10 H10 Cd N4 |
| Sum formula    | C10 H10 Cd N4 | C10 H10 Cd N4 |
| Mr             | 298.63        | 298.63        |
| Dx,g cm-3      | 0.982         | 0.982         |
| Z              | 12            | 12            |
| Mu (mm-1)      | 8.531         | 0.000         |
| F000           | 1752.0        | 1752.0        |
| F000'          | 1757.67       |               |
| h,k,lmax       | 8,8,8         |               |
| Nref           | 63[ 40]       |               |
| Tmin,Tmax      |               |               |
| Tmin'          |               |               |

Correction method= Not given

Data completeness= 0.00/0.00      Theta(max)=

R(reflections)=      wR2(reflections)=

S =      Npar=

The following ALERTS were generated. Each ALERT has the format  
**test-name\_ALERT\_alert-type\_alert-level**.  
Click on the hyperlinks for more details of the test.

 **Alert level A**

PLAT601\_ALERT\_2\_A Structure Contains Solvent Accessible VOIDS of .      2904 Ang\*\*3

**Author Response: This is an open, microporous metal-organic framework.  
This is an open, microporous metal-organic framework.**

 **Alert level B**

PLAT049\_ALERT\_1\_B Calculated Density Less Than 1.0 gcm-3 .....      0.9816 Check

**Author Response: Low density is a consequence of structure porosity. Low  
density is a consequence of structure porosity.**

 **Alert level C**

REFI015\_ALERT\_1\_C \_refine\_ls\_shift/su\_max is missing  
Maximum shift/s.u. ratio after final refinement cycle.  
The following tests will not be performed



SHFSU\_01  
PLAT342\_ALERT\_3\_C Low Bond Precision on C-C Bonds ..... 0.02 Ang.

---

**Alert level G**

|                   |                                                  |                |           |
|-------------------|--------------------------------------------------|----------------|-----------|
| PLAT164_ALERT_4_G | Nr. of Refined C-H H-Atoms in Heavy-Atom Struct. | 2              | Note      |
| PLAT300_ALERT_4_G | Atom Site Occupancy of C4                        | Constrained at | 0.5 Check |
| PLAT300_ALERT_4_G | Atom Site Occupancy of H2                        | Constrained at | 0.5 Check |
| PLAT300_ALERT_4_G | Atom Site Occupancy of H3                        | Constrained at | 0.5 Check |
| PLAT300_ALERT_4_G | Atom Site Occupancy of H4                        | Constrained at | 0.5 Check |
| PLAT301_ALERT_3_G | Main Residue Disorder .....(Resd 1 )             | 12%            | Note      |
| PLAT789_ALERT_4_G | Atoms with Negative _atom_site_disorder_group #  | 4              | Check     |
| PLAT804_ALERT_5_G | Number of ARU-Code Packing Problem(s) in PLATON  | 1              | Info      |
| PLAT860_ALERT_3_G | Number of Least-Squares Restraints .....         | 1              | Note      |

- 
- 1 **ALERT level A** = Most likely a serious problem - resolve or explain  
1 **ALERT level B** = A potentially serious problem, consider carefully  
2 **ALERT level C** = Check. Ensure it is not caused by an omission or oversight  
9 **ALERT level G** = General information/check it is not something unexpected

- 2 ALERT type 1 CIF construction/syntax error, inconsistent or missing data  
1 ALERT type 2 Indicator that the structure model may be wrong or deficient  
3 ALERT type 3 Indicator that the structure quality may be low  
6 ALERT type 4 Improvement, methodology, query or suggestion  
1 ALERT type 5 Informative message, check
- 

It is advisable to attempt to resolve as many as possible of the alerts in all categories. Often the minor alerts point to easily fixed oversights, errors and omissions in your CIF or refinement strategy, so attention to these fine details can be worthwhile. In order to resolve some of the more serious problems it may be necessary to carry out additional measurements or structure refinements. However, the purpose of your study may justify the reported deviations and the more serious of these should normally be commented upon in the discussion or experimental section of a paper or in the "special\_details" fields of the CIF. checkCIF was carefully designed to identify outliers and unusual parameters, but every test has its limitations and alerts that are not important in a particular case may appear. Conversely, the absence of alerts does not guarantee there are no aspects of the results needing attention. It is up to the individual to critically assess their own results and, if necessary, seek expert advice.

### Publication of your CIF in IUCr journals

A basic structural check has been run on your CIF. These basic checks will be run on all CIFs submitted for publication in IUCr journals (*Acta Crystallographica*, *Journal of Applied Crystallography*, *Journal of Synchrotron Radiation*); however, if you intend to submit to *Acta Crystallographica Section C* or *E* or *IUCrData*, you should make sure that full publication checks are run on the final version of your CIF prior to submission.

### Publication of your CIF in other journals

Please refer to the *Notes for Authors* of the relevant journal for any special instructions relating to CIF submission.

PLATON version of 26/09/2018; check.def file version of 13/09/2018

Datablock Zn\_AIm - ellipsoid plot

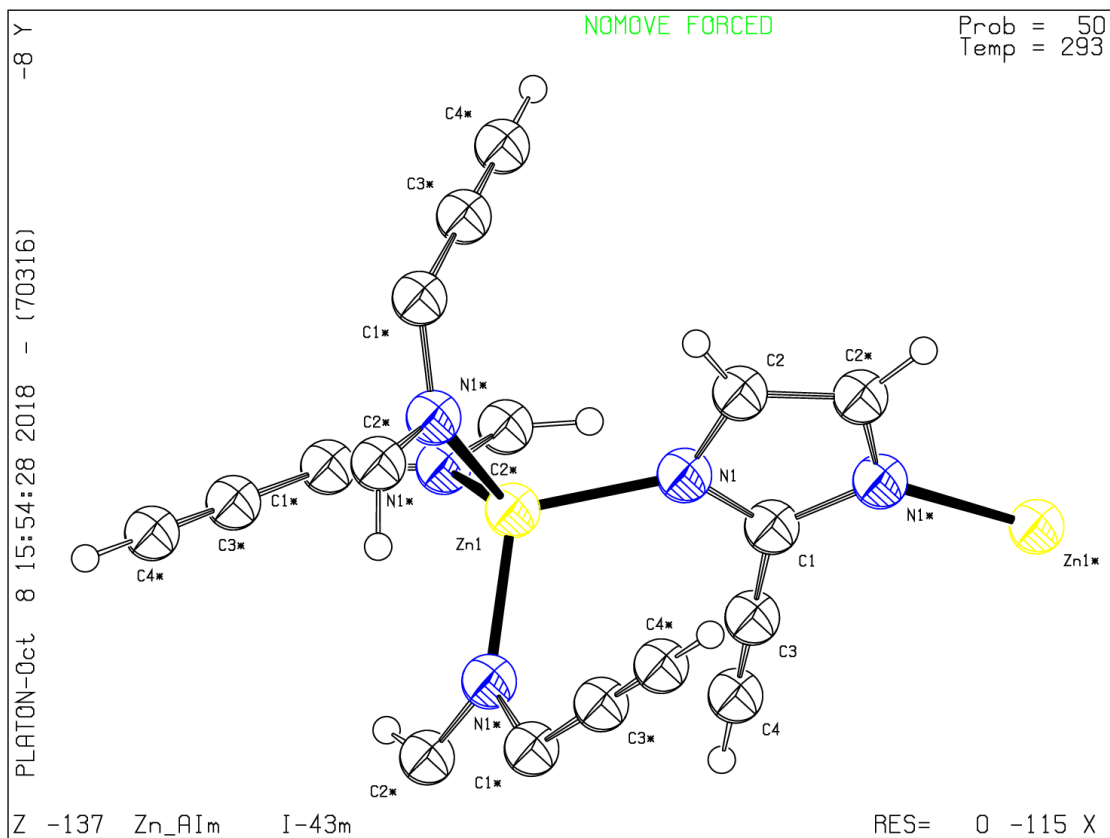

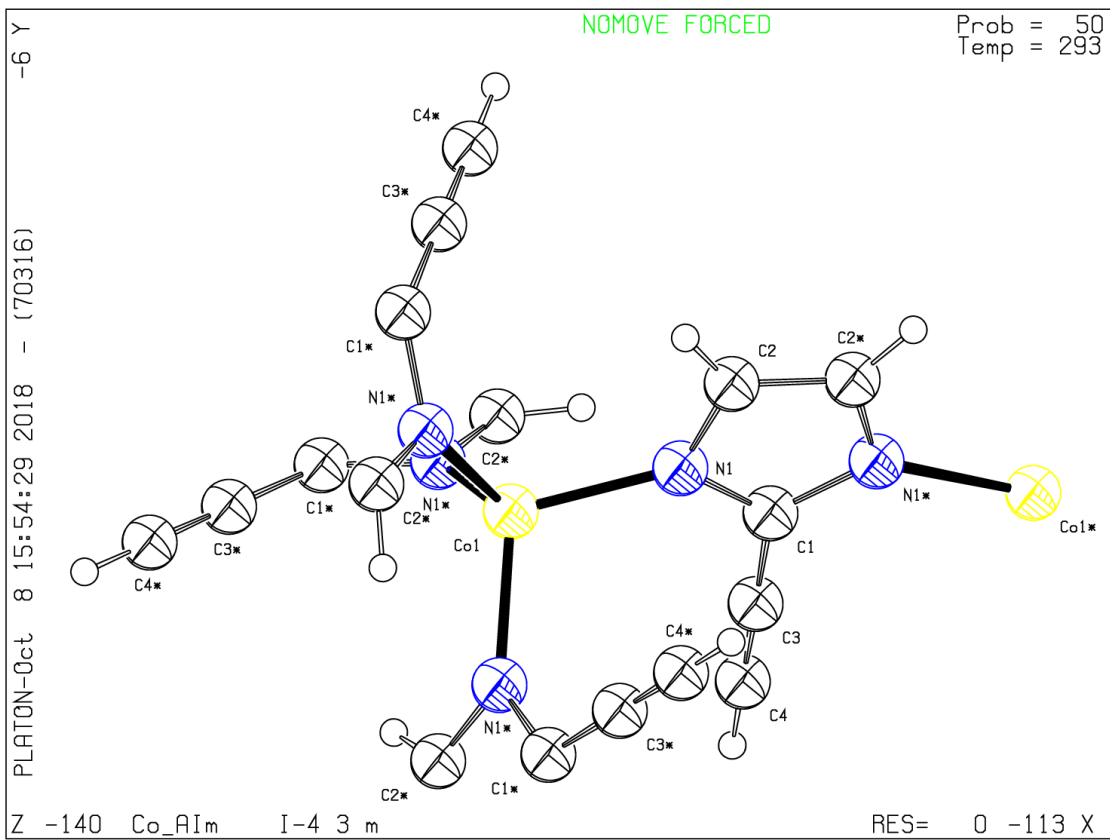



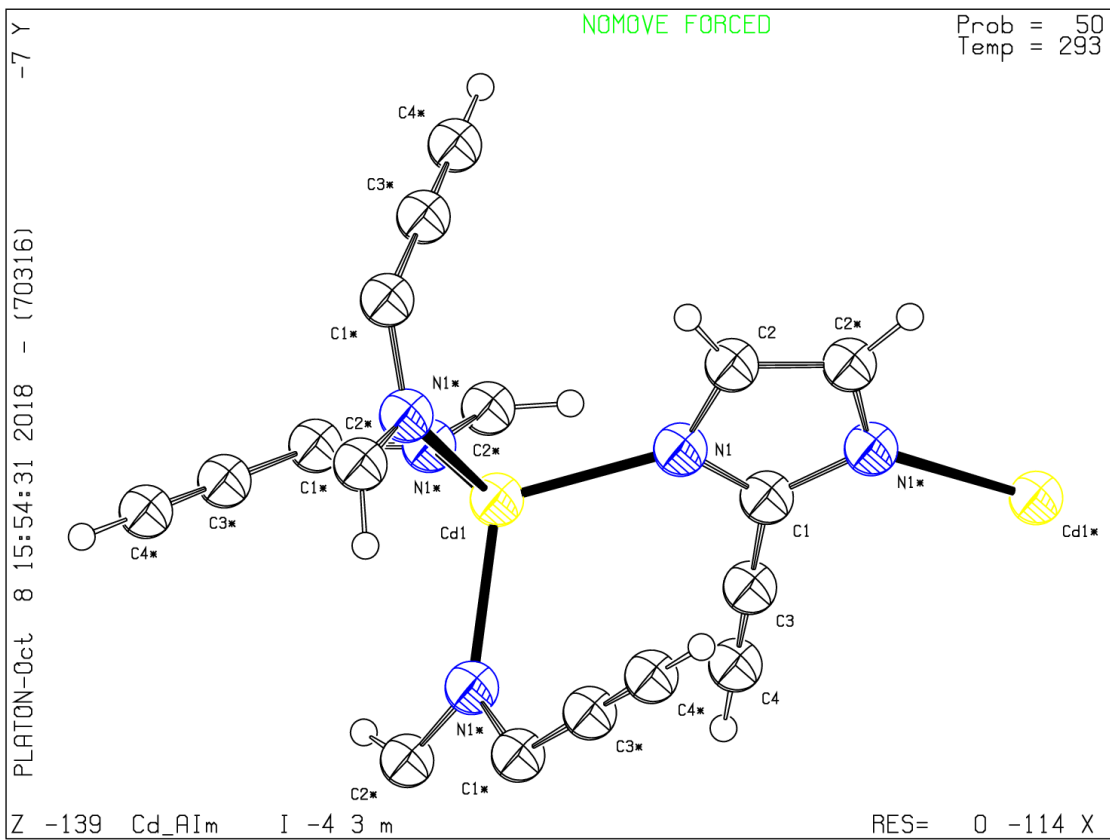

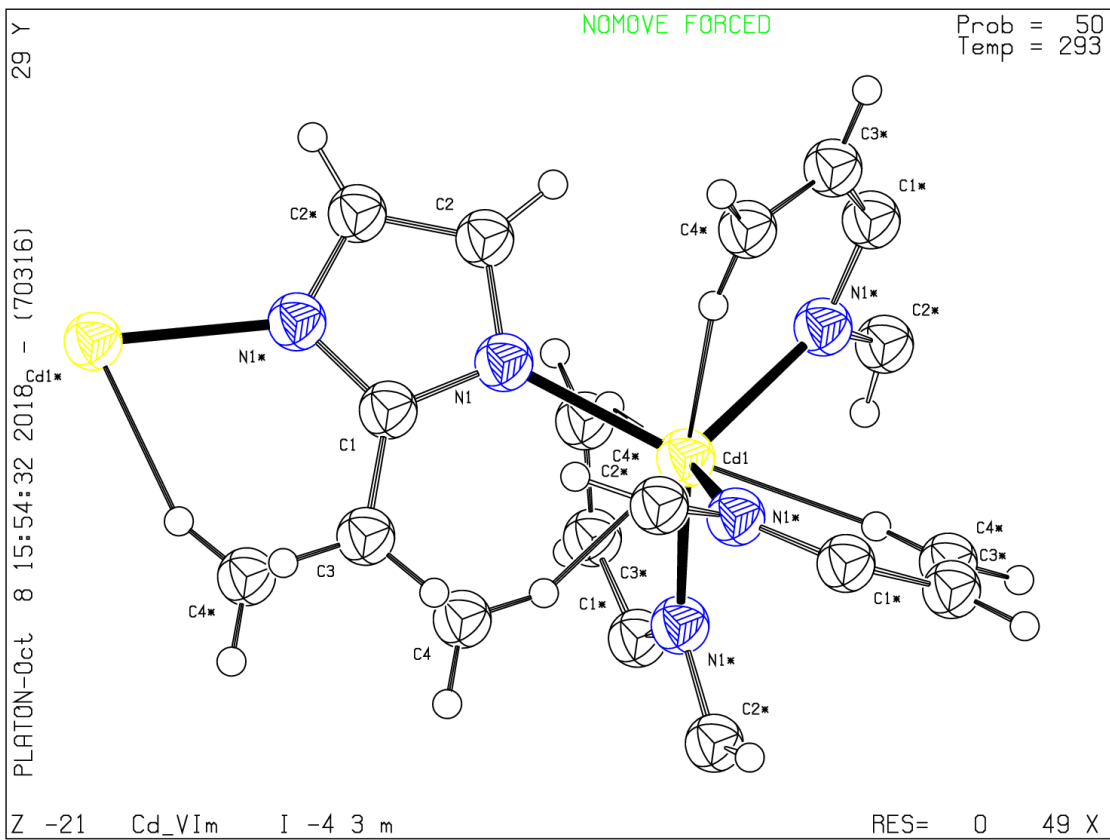

Supplement: aav9044_Data_file_S2.pdf [file aav9044_Data_file_S2.pdf]
