# Supplementary material for: Hypergolic zeolitic imidazolate frameworks (ZIFs) as next-generation solid fuels: Unlocking the latent energetic behavior of ZIFs
Source: PubMed Central journal article supplement — Sci Adv. 2019 Apr 5;5(4):eaav9044. doi: 10.1126/sciadv.aav9044 (PMC6450693; doi:10.1126/sciadv.aav9044), 2019-04-05
Supplement: aav9044_SM.pdf [file aav9044_SM.pdf]

## Supplementary Materials for

### Hypergolic zeolitic imidazolate frameworks (ZIFs) as next-generation solid fuels: Unlocking the latent energetic behavior of ZIFs

H. M. Titi, J. M. Marrett, G. Dayaker, M. Arhangelskis, C. Mottillo, A. J. Morris,  
G. P. Rachiero, T. Friščić\*, R. D. Rogers\*

\*Corresponding author. Email: tomlav.friscic@mcgill.ca (T.F.); robin.rogers@525solutions.com (R.D.R.)

Published 5 April 2019, *Sci. Adv.* **5**, eaav9044 (2019)  
DOI: 10.1126/sciadv.aav9044

#### The PDF file includes:

- Fig. S1. Reaction scheme for the synthesis of HAIM.
- Fig. S2. NMR spectra for the ligand HAIM.
- Fig. S3. Overlay of PXRD patterns of mechanochemically prepared ZIFs immediately after milling, compared to the simulated pattern for ZIF-8.
- Fig. S4. Thermal analysis data for acetylene-substituted MOFs.
- Fig. S5. Thermal analysis data for vinyl-substituted MOFs.
- Fig. S6. Overlay of selected FTIR-ATR spectra.
- Fig. S7. Selected solid-state NMR spectra.
- Fig. S8. Comparison of PXRD patterns for selected MOFs after impact testing.
- Fig. S9. Selected images of hypergolic drop tests on hypergolic ZIFs using RFNA oxidizer.
- Fig. S10. Nitrogen desorption and adsorption curves for selected MOFs.
- Fig. S11. Thermogravimetric analysis of ZIFs with included nitromethane guest.
- Fig. S12. Selected examples of hypergolic drop tests on ZIFs containing guests.
- Fig. S13. Calculated DOS plots for the herein studied frameworks.
- Fig. S14. The hypergolicity of selected ZIFs after 1 month using WFNA as an oxidizer.
- Fig. S15. Illustration of vinyl-substituent disorder in the structure of SOD-Co(VIm)<sub>2</sub>.
- Table S1. Summary of crystallographic and Rietveld refinement parameters.
- Table S2. Reaction equations used in the calculation of combustion energies.
- Table S3. Calculated bandgaps for herein studied ZIF structures.
- Legends for Data file S1 to S3

#### Other Supplementary Material for this manuscript includes the following:

(available at [advances.sciencemag.org/cgi/content/full/5/4/eaav9044/DC1](https://advances.sciencemag.org/cgi/content/full/5/4/eaav9044/DC1))

Data file S1. Crystallographic data (in CIF format) for crystal structures of ZIF materials.

Data file S2. CheckCIF (in PDF format) for crystal structures of ZIF materials.

Data file S3. Movie (in MOV format) of an example drop test conducted using  $\text{Co}(\mathbf{AIM})_2$ , with WFNA as the oxidizer.

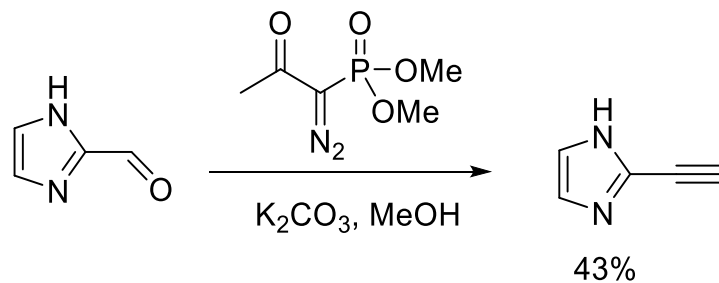

**Fig. S1.** Reaction scheme for the synthesis of HAIIm.

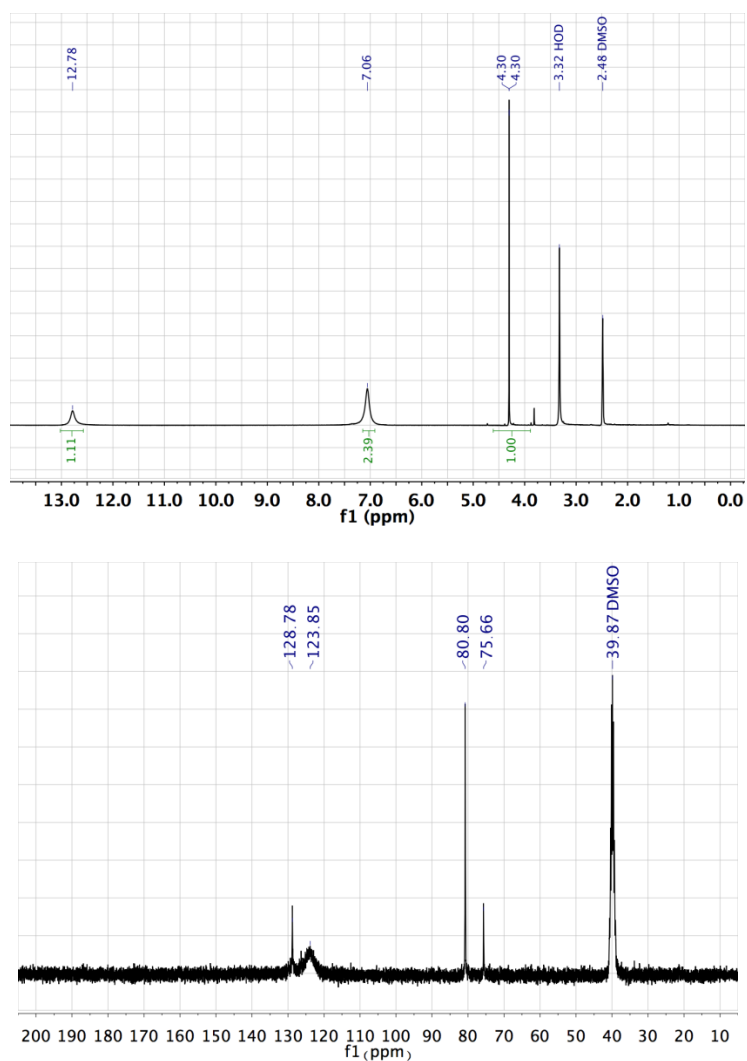

**Fig. S2.** NMR spectra for the ligand HAIIm. (top)  $^1\text{H}$  NMR spectrum and (bottom)  $^{13}\text{C}$  NMR spectrum of HAIIm recorded in  $\text{DMSO-}d_6$ .

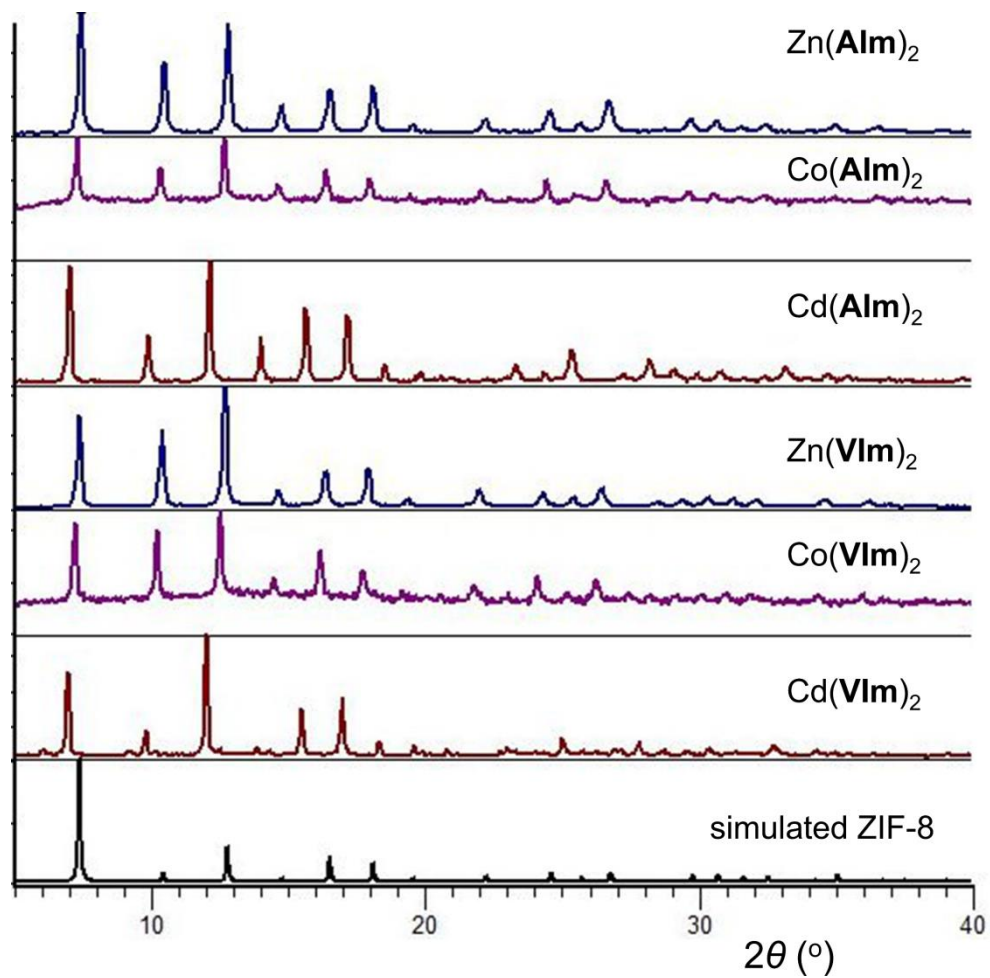

**Fig. S3.** Overlay of PXRD patterns of mechanochemically prepared ZIFs immediately after milling, compared to the simulated pattern for ZIF-8.

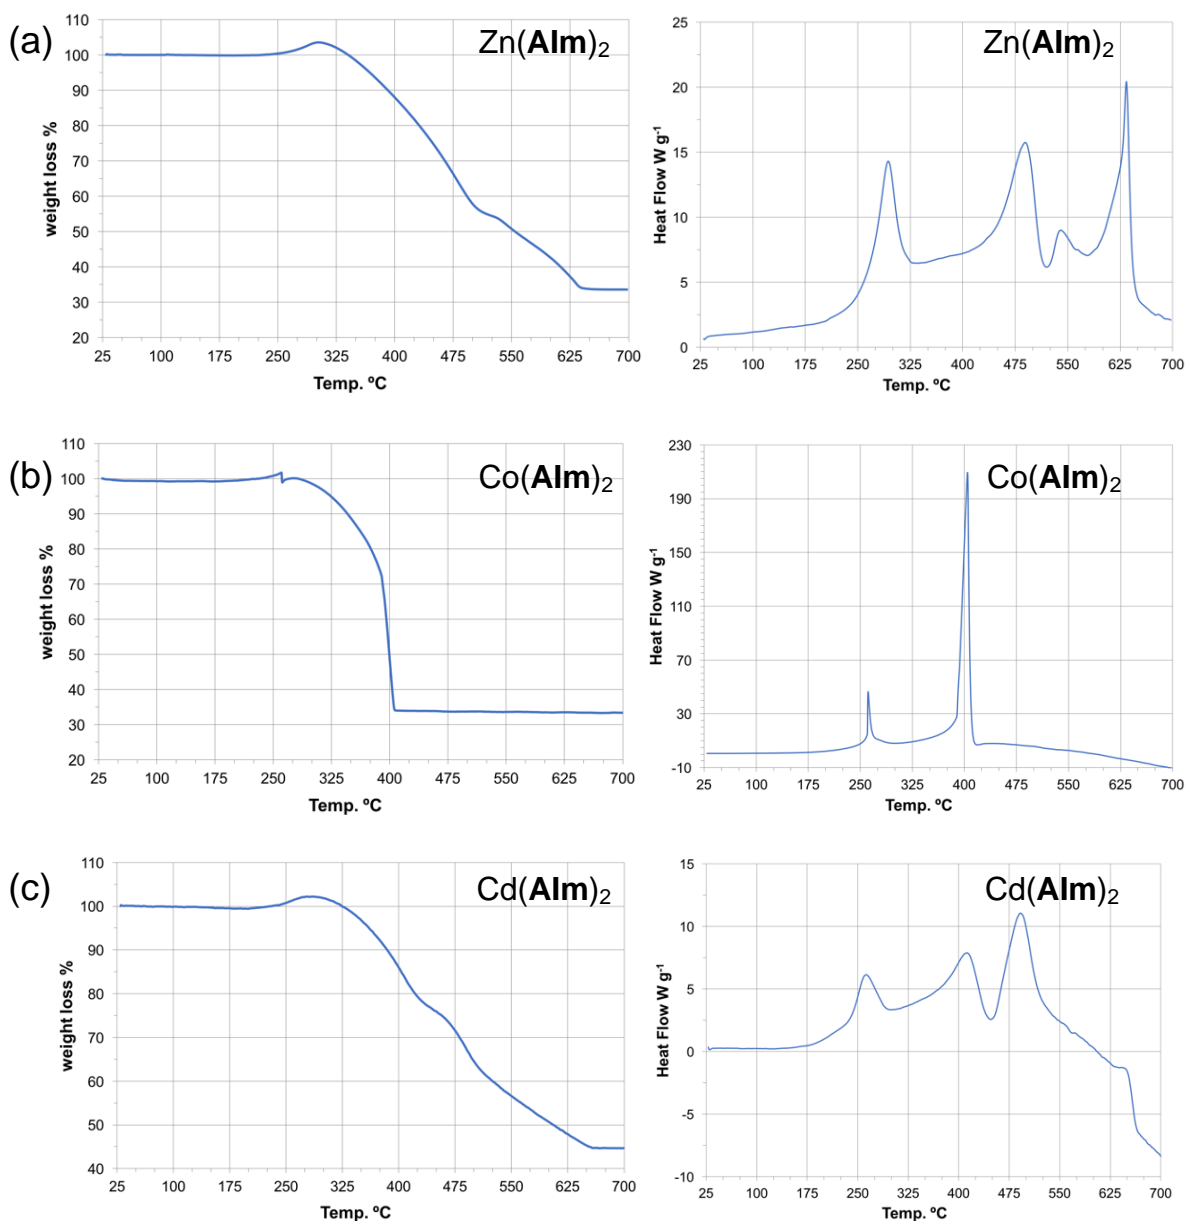

**Fig. S4. Thermal analysis data for acetylene-substituted MOFs.** The TGA (*left*) and DSC (*right*) thermograms of: (a) SOD-Zn(AIm)<sub>2</sub> in air, experimental residue: 33.6%; calculated for ZnO: 32.9%; (b) SOD-Co(AIm)<sub>2</sub> in air, experimental residue: 33.7%; calculated for Co<sub>3</sub>O<sub>4</sub>: 33.3%; (c) SOD-Cd(AIm)<sub>2</sub> in air, experimental residue: 44.6%; calculated for CdO: 43.5%.

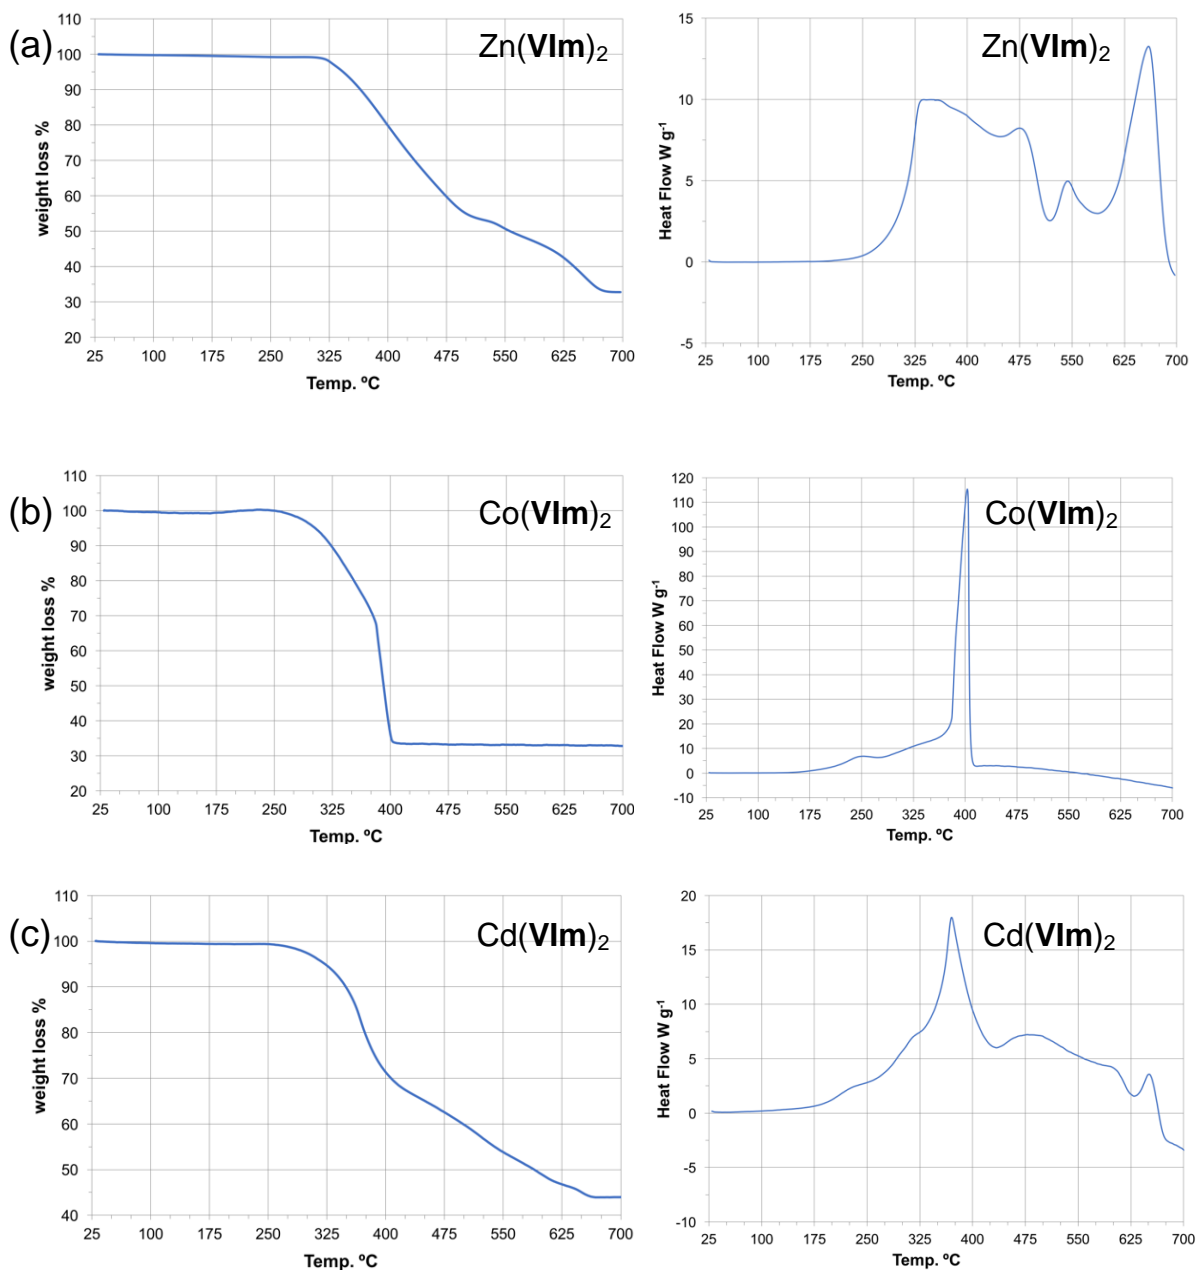

**Fig. S5. Thermal analysis data for vinyl-substituted MOFs.** The TGA (*left*) and DSC (*right*) thermograms recorded in air for: (a) SOD-Zn(VIm)<sub>2</sub>, experimental residue: 33.6%; calculated for ZnO: 32.3%; (b) SOD-Co(VIm)<sub>2</sub>, experimental residue: 33.0%; calculated for Co<sub>3</sub>O<sub>4</sub>: 32.7%; (c) SOD-Cd(VIm)<sub>2</sub>, experimental residue: 43.9%; calculated for CdO: 42.9%.

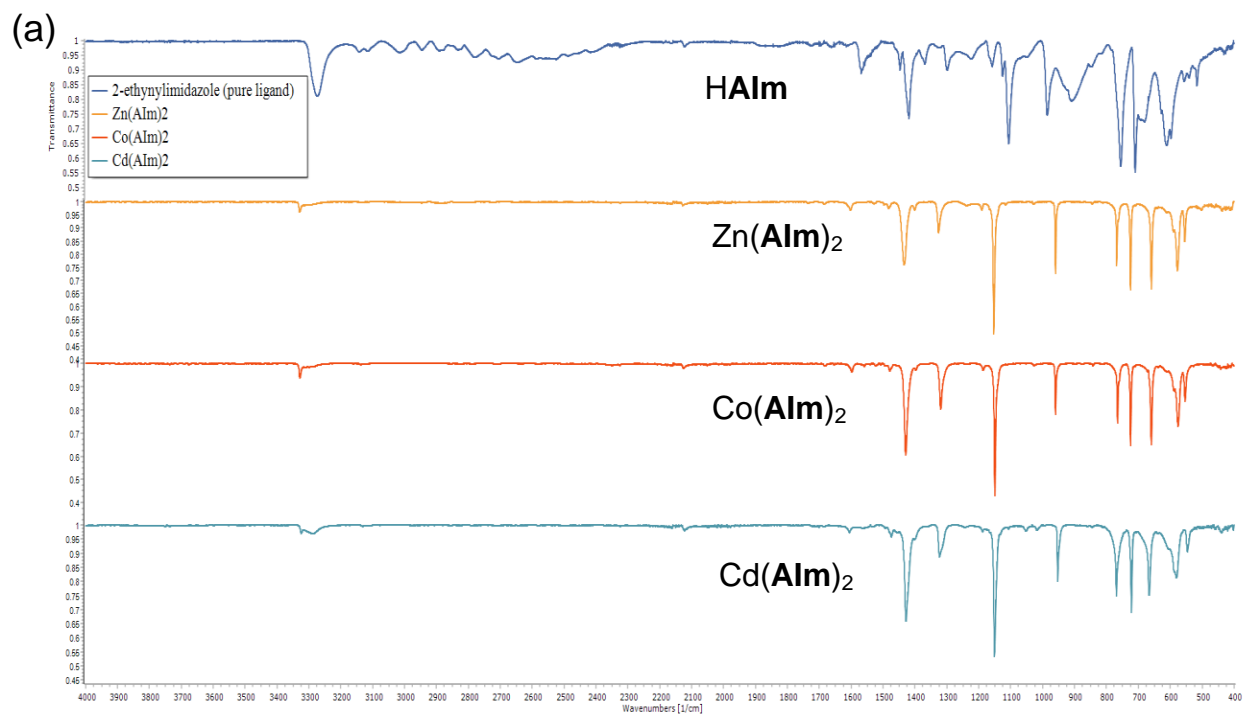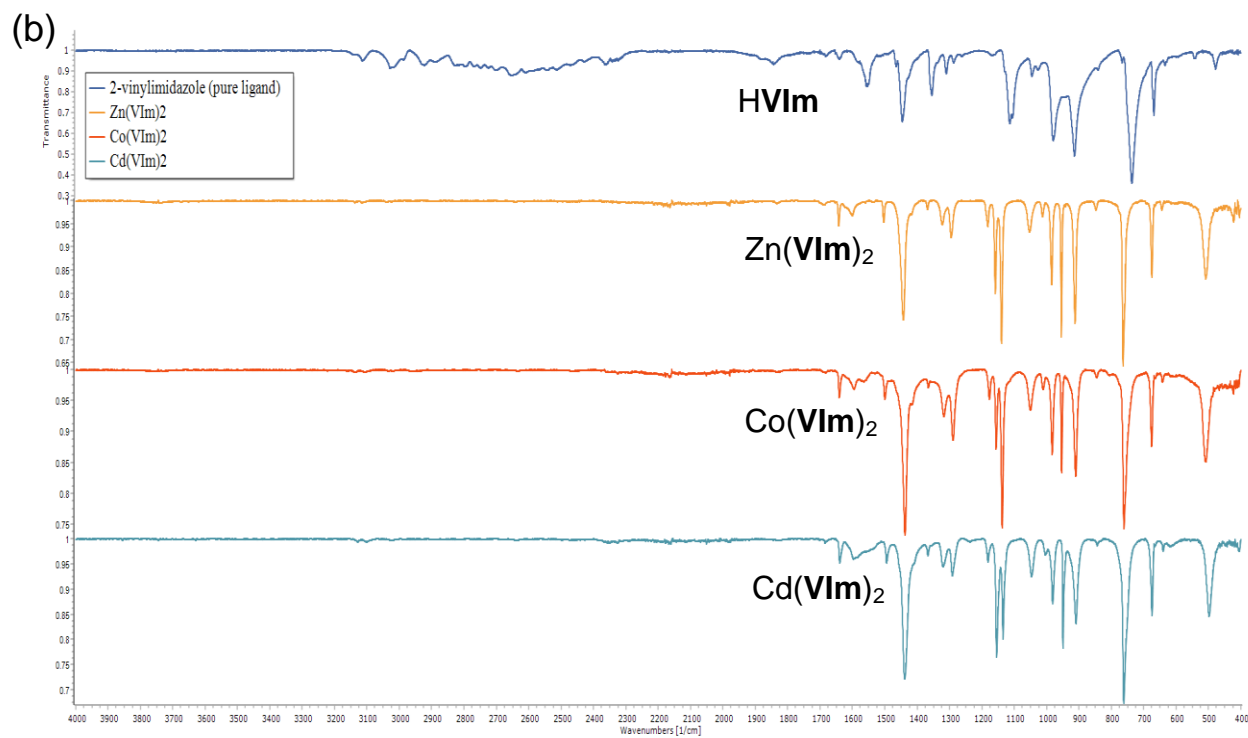

**Fig. S6.** Overlay of FTIR-ATR spectra for: (a) HAlm, Zn(AIm)<sub>2</sub>, Co(AIm)<sub>2</sub>, Cd(AIm)<sub>2</sub> and (b) HVIm, Zn(VIm)<sub>2</sub>, Co(VIm)<sub>2</sub>, Cd(VIm)<sub>2</sub>.

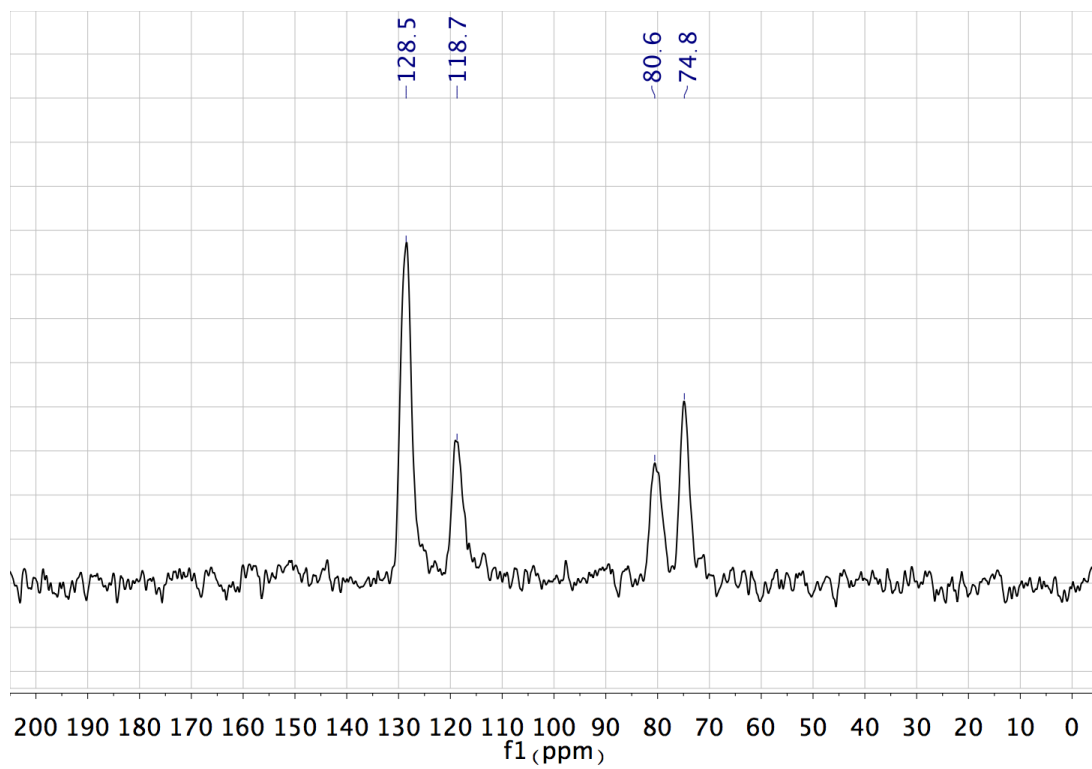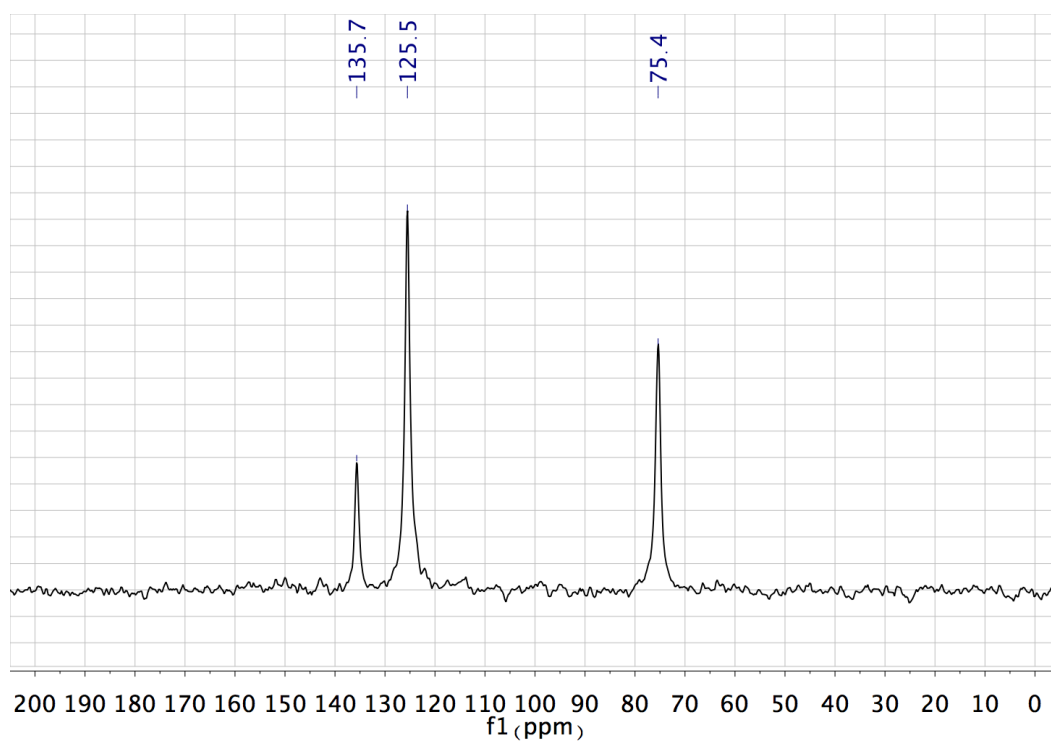

**Fig. S7.** Solid-state CP-MAS  $^{13}\text{C}$  NMR spectra for: (*top*) **HAlm** and (*bottom*) **SOD-Zn(Alm)<sub>2</sub>**.



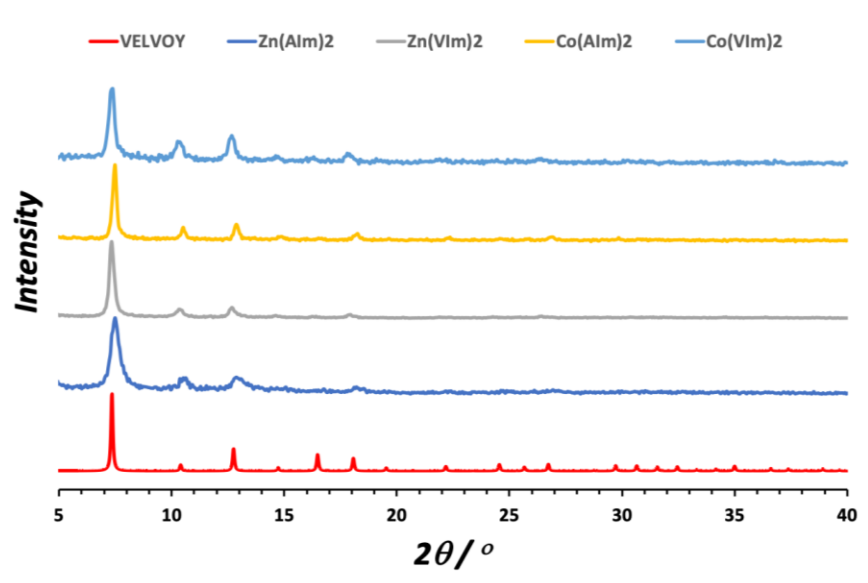

**Fig. S8.** Comparison of PXRD patterns for the hypergolic MOFs after 50 J impact test (from top to bottom): Zn(**AIm**)<sub>2</sub>, Co(**AIm**)<sub>2</sub>, Zn(**VIm**)<sub>2</sub>, Co(**VIm**)<sub>2</sub> and the calculated pattern for the isostructural SOD-topology ZIF-8 (CSD code VELVOY) as a reference.

|                    | M(Aim) <sub>2</sub>                                                                                   | M(Vim) <sub>2</sub>                                                                                    |
|--------------------|-------------------------------------------------------------------------------------------------------|--------------------------------------------------------------------------------------------------------|
| Zn(L) <sub>2</sub> | <br>12 ms    60 ms   | <br>No ID    140 ms  |
| Co(L) <sub>2</sub> | <br>157 ms    290 ms | <br>164 ms    208 ms |
| Cd(L) <sub>2</sub> | <br>30 ms    56 ms   | <br>No ID    237 ms  |

**Fig. S9. Selected images of hypergolic drop tests on hypergolic ZIFs using RFNA oxidizer.**

In each case, the first image corresponds to the first observable frame in which ignition is visible, and the number below indicates the ID. The second image corresponds to an arbitrary point after ignition, illustrating the induced flame. Photo credit: Dr. Hatem M. Titi, McGill University.

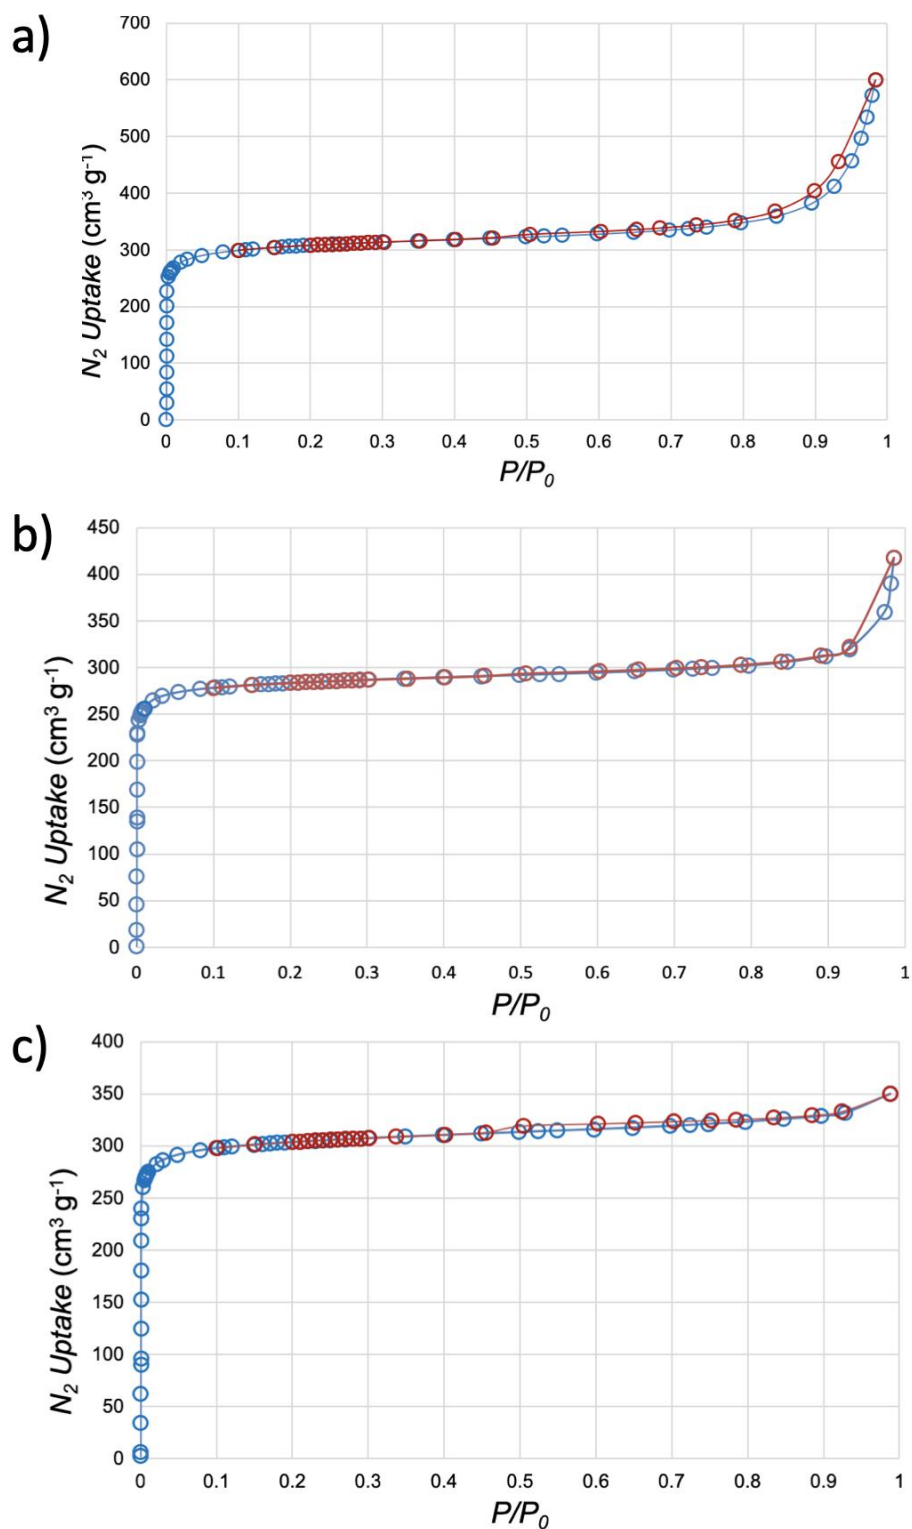

**Fig. S10.** Nitrogen desorption and adsorption curves for selected hypergolic MOFs after washing and evacuation: (a)  $\text{Zn}(\text{AIm})_2$ ; (b)  $\text{Co}(\text{AIm})_2$  and (c)  $\text{Co}(\text{VIm})_2$ . Calculated BET surface areas for  $\text{Zn}(\text{AIm})_2$ ,  $\text{Co}(\text{AIm})_2$  and  $\text{Co}(\text{VIm})_2$  are  $1215 \text{ m}^2/\text{g}$ ,  $1135 \text{ m}^2/\text{g}$  and  $1210 \text{ m}^2/\text{g}$ , respectively.

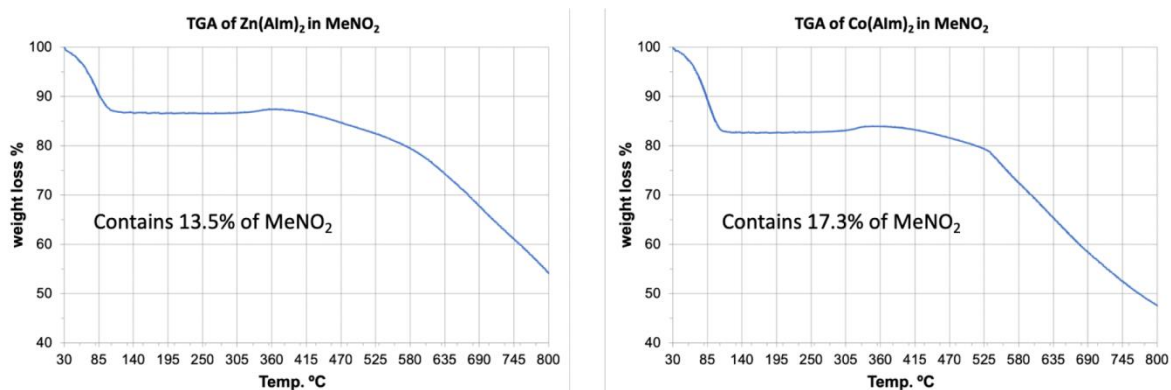

**Fig. S11.** Thermogravimetric analysis of (a) Zn(AIm)<sub>2</sub> and (b) Co(AIm)<sub>2</sub> after overnight suspension and stirring in nitromethane, demonstrating the inclusion of ca. 14% and 17% of nitromethane by weight.

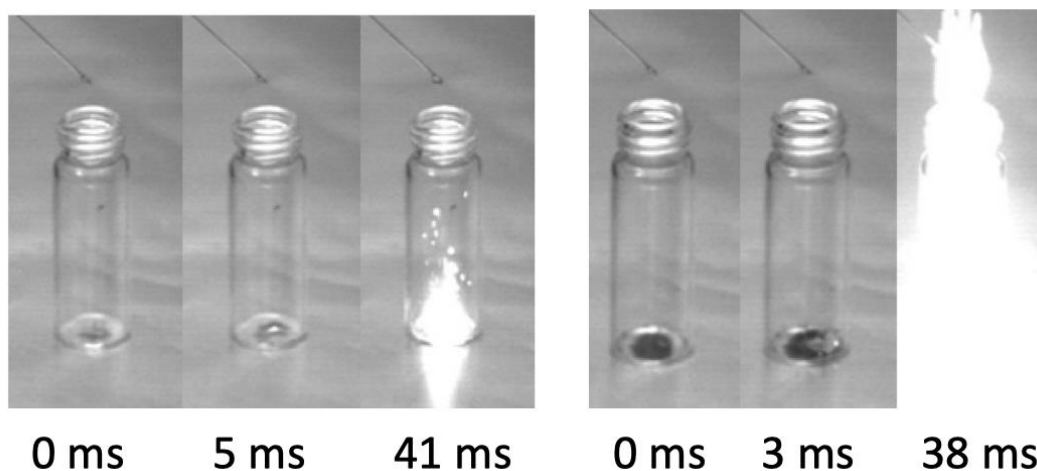

**Fig. S12.** Selected examples of hypergolic drop tests on ZIFs containing guests. Hypergolic drop tests for Zn(AIm)<sub>2</sub> (left) and Co(AIm)<sub>2</sub> (right) samples containing nitromethane guest. Photo credit: Dr. Hatem M. Titi, McGill University.

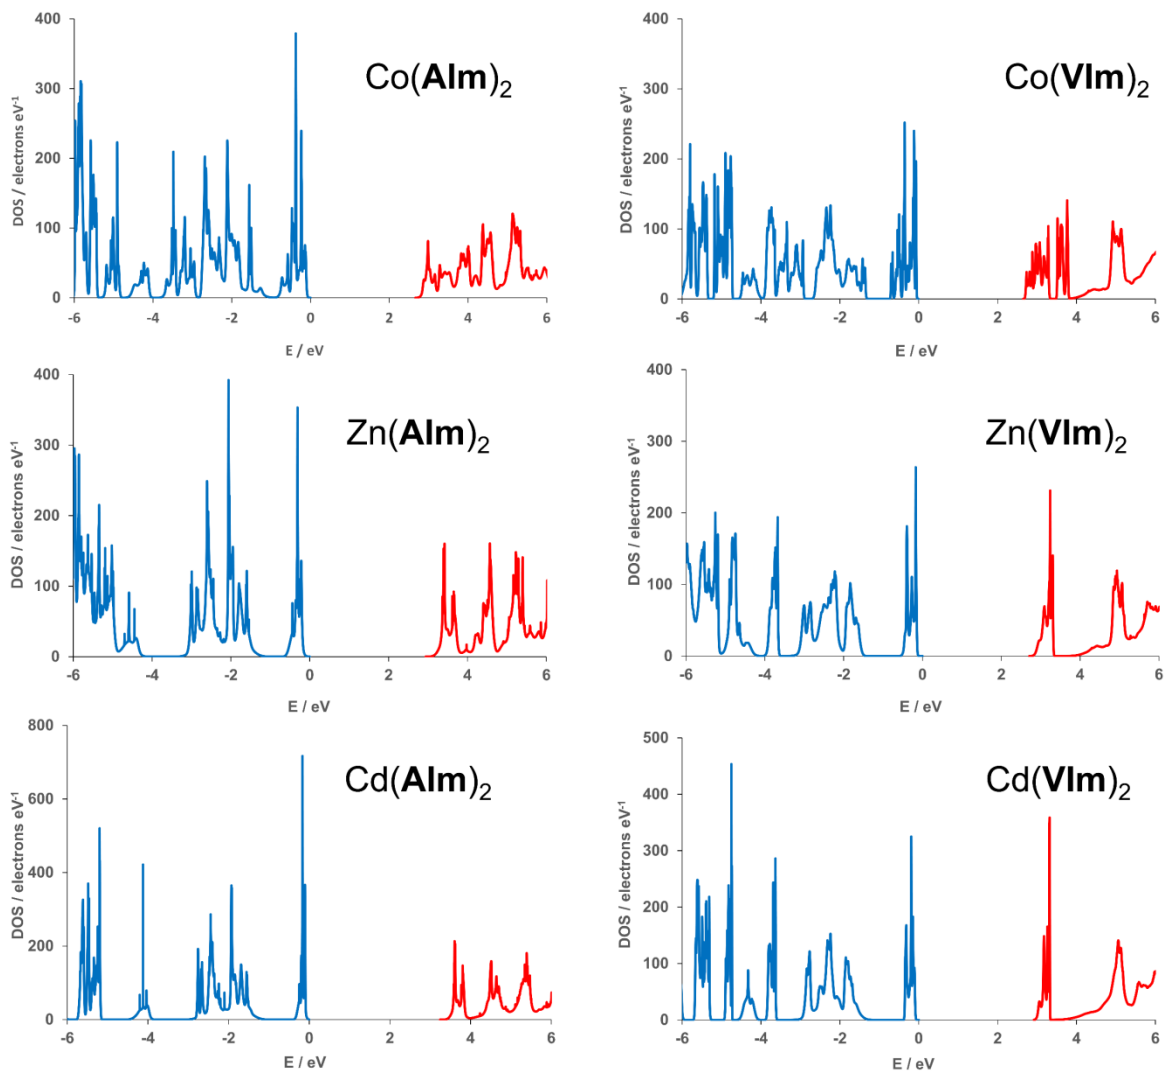

**Fig. S13. Calculated DOS plots for the herein studied frameworks.**

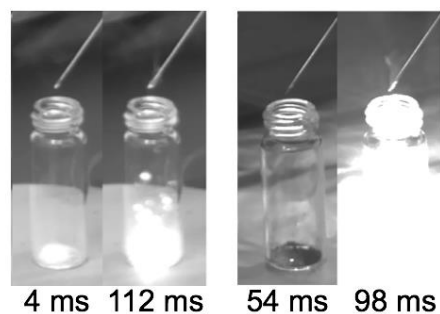

**Fig. S14.** The hypergolicity of selected ZIFs after 1 month using WFNA as an oxidizer. Images illustrate the behavior of: SOD-Zn(AIm)<sub>2</sub> (*left*) and SOD-Co(AIm)<sub>2</sub> (*right*). For each material, the first image corresponds to the first observable frame in which ignition is visible, and thus the number below that image is the ignition delay. The second image corresponds to an arbitrary point after ignition, and illustrates the intensity and character of the flame. Photo credit: Dr. Hatem M. Titi, McGill University.

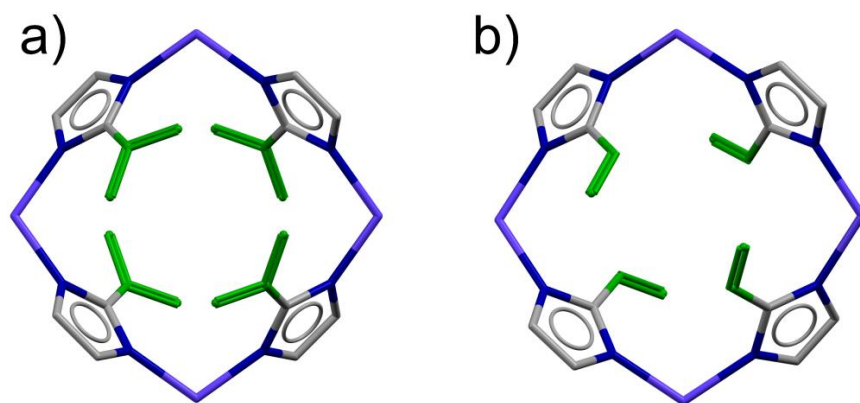

**Fig. S15.** Illustration of the orientation of vinyl substituents (green) in the SOD-Co(VIm)<sub>2</sub> structure: a) experimental structure with vinyl group disordered by mirror plane symmetry; b) ordered model missing mirror symmetry, used in periodic DFT calculations. Hydrogen atoms were omitted for clarity.

**Table S1. Summary of crystallographic and Rietveld refinement parameters.**

| Material                     | Zn(AIm) <sub>2</sub>                                           | Co(AIm) <sub>2</sub>                                           | Co(VIm) <sub>2</sub>                                           | Cd(AIm) <sub>2</sub>                                           | Cd(VIm) <sub>2</sub>                                           |
|------------------------------|----------------------------------------------------------------|----------------------------------------------------------------|----------------------------------------------------------------|----------------------------------------------------------------|----------------------------------------------------------------|
| chemical formula             | Zn(C <sub>5</sub> H <sub>3</sub> N <sub>2</sub> ) <sub>2</sub> | Co(C <sub>5</sub> H <sub>3</sub> N <sub>2</sub> ) <sub>2</sub> | Co(C <sub>5</sub> H <sub>5</sub> N <sub>2</sub> ) <sub>2</sub> | Cd(C <sub>5</sub> H <sub>3</sub> N <sub>2</sub> ) <sub>2</sub> | Cd(C <sub>5</sub> H <sub>5</sub> N <sub>2</sub> ) <sub>2</sub> |
| $M_r / \text{g mol}^{-1}$    | 247.56                                                         | 241.12                                                         | 245.15                                                         | 294.60                                                         | 298.63                                                         |
| Crystal system               | cubic                                                          | cubic                                                          | cubic                                                          | cubic                                                          | cubic                                                          |
| $a / \text{Å}$               | 17.0454(11)                                                    | 16.9604(17)                                                    | 17.2960(14)                                                    | 17.9712(9)                                                     | 18.234(2)                                                      |
| $b / \text{Å}$               | 17.0454(11)                                                    | 16.9604(17)                                                    | 17.2960(14)                                                    | 17.9712(9)                                                     | 18.234(2)                                                      |
| $c / \text{Å}$               | 17.0454(11)                                                    | 16.9604(17)                                                    | 17.2960(14)                                                    | 17.9712(9)                                                     | 18.234(2)                                                      |
| $\alpha / ^\circ$            | 90                                                             | 90                                                             | 90                                                             | 90                                                             | 90                                                             |
| $\beta / ^\circ$             | 90                                                             | 90                                                             | 90                                                             | 90                                                             | 90                                                             |
| $\gamma / ^\circ$            | 90                                                             | 90                                                             | 90                                                             | 90                                                             | 90                                                             |
| $V / \text{Å}^3$             | 4952.5(9)                                                      | 4878.8(14)                                                     | 5174.1(13)                                                     | 5804.0(9)                                                      | 6062(2)                                                        |
| Space group                  | <i>I</i> -4 3 m                                                |
| Density / g cm <sup>-3</sup> | 0.996                                                          | 0.985                                                          | 0.944                                                          | 1.011                                                          | 0.982                                                          |
| Radiation type               | CuK <sub>α</sub>                                               |
| F(000)                       | 1488                                                           | 1452                                                           | 1500                                                           | 1704                                                           | 1752                                                           |
| R <sub>wp</sub>              | 0.118                                                          | 0.048                                                          | 0.065                                                          | 0.068                                                          | 0.076                                                          |
| R <sub>p</sub>               | 0.092                                                          | 0.036                                                          | 0.050                                                          | 0.055                                                          | 0.058                                                          |
| R <sub>Bragg</sub>           | 0.082                                                          | 0.027                                                          | 0.051                                                          | 0.051                                                          | 0.023                                                          |
| $\chi^2$                     | 4.137                                                          | 1.460                                                          | 2.407                                                          | 1.971                                                          | 3.533                                                          |

**Table S2. Reaction equations used in the calculation of combustion energies.**

| Fuel material        | Reaction equation                                                                                                                                                                                                                            |
|----------------------|----------------------------------------------------------------------------------------------------------------------------------------------------------------------------------------------------------------------------------------------|
| ZIF-8                | $\text{Zn}(\text{C}_4\text{H}_5\text{N}_2)_2 (\text{s}) + 11 \text{O}_2 (\text{g}) \rightarrow \text{ZnO} (\text{s}) + 8 \text{CO}_2 (\text{g}) + 2\text{N}_2 (\text{g}) + 5\text{H}_2\text{O} (\text{g})$                                   |
| Zn(VIm) <sub>2</sub> | $\text{Zn}(\text{C}_5\text{H}_5\text{N}_2)_2 (\text{s}) + 13 \text{O}_2 (\text{g}) \rightarrow \text{ZnO} (\text{s}) + 10 \text{CO}_2 (\text{g}) + 2\text{N}_2 (\text{g}) + 5\text{H}_2\text{O} (\text{g})$                                  |
| Zn(AIm) <sub>2</sub> | $\text{Zn}(\text{C}_5\text{H}_3\text{N}_2)_2 (\text{s}) + 12 \text{O}_2 (\text{g}) \rightarrow \text{ZnO} (\text{s}) + 10 \text{CO}_2 (\text{g}) + 2\text{N}_2 (\text{g}) + 3\text{H}_2\text{O} (\text{g})$                                  |
| Co(VIm) <sub>2</sub> | $\text{Co}(\text{C}_5\text{H}_5\text{N}_2)_2 (\text{s}) + 13\frac{1}{2} \text{O}_2 (\text{g}) \rightarrow \frac{1}{3}\text{Co}_3\text{O}_4 (\text{s}) + 10 \text{CO}_2 (\text{g}) + 2\text{N}_2 (\text{g}) + 5\text{H}_2\text{O} (\text{g})$ |
| Co(AIm) <sub>2</sub> | $\text{Co}(\text{C}_5\text{H}_3\text{N}_2)_2 (\text{s}) + 12\frac{1}{2} \text{O}_2 (\text{g}) \rightarrow \frac{1}{3}\text{Co}_3\text{O}_4 (\text{s}) + 10 \text{CO}_2 (\text{g}) + 2\text{N}_2 (\text{g}) + 3\text{H}_2\text{O} (\text{g})$ |
| Cd(VIm) <sub>2</sub> | $\text{Cd}(\text{C}_5\text{H}_5\text{N}_2)_2 (\text{s}) + 13 \text{O}_2 (\text{g}) \rightarrow \text{CdO} (\text{s}) + 10 \text{CO}_2 (\text{g}) + 2\text{N}_2 (\text{g}) + 5\text{H}_2\text{O} (\text{g})$                                  |
| Cd(AIm) <sub>2</sub> | $\text{Cd}(\text{C}_5\text{H}_3\text{N}_2)_2 (\text{s}) + 12 \text{O}_2 (\text{g}) \rightarrow \text{CdO} (\text{s}) + 10 \text{CO}_2 (\text{g}) + 2\text{N}_2 (\text{g}) + 3\text{H}_2\text{O} (\text{g})$                                  |

**Table S3. Calculated bandgaps for herein studied ZIF structures.**

| Structure            | Calculated band gap / eV |
|----------------------|--------------------------|
| Co(AIm) <sub>2</sub> | 2.993                    |
| Zn(AIm) <sub>2</sub> | 3.475                    |
| Cd(AIm) <sub>2</sub> | 3.618                    |
| Co(VIm) <sub>2</sub> | 2.785                    |
| Zn(VIm) <sub>2</sub> | 3.070                    |
| Cd(VIm) <sub>2</sub> | 3.143                    |

**Data file S1. Crystallographic data (in CIF format) for crystal structures of ZIF materials.**

**Data file S2. CheckCIF (in pdf format) for crystal structures of ZIF materials.**

**Data file S3. Movie (in MOV format) of an example drop test conducted using Co(AIm)<sub>2</sub>, with WFNA as the oxidizer.** Contact of oxidizer and the MOF is at 86 ms, and ignition takes place at 89 ms, corresponding to ID of 3 ms. The entire movie length is 180 ms.
